# Supplementary material
Source: PubMed Central journal article supplement (PMC5413193)
Supplement: tx5b00481_si_001.pdf [file tx5b00481_si_001.pdf]

## Supporting Information

### ToxCast EPA *in vitro* to *in vivo* challenge: Insight into Rank-I model

Sergii Novotarskyi,<sup>a,1</sup> Ahmed Abdelaziz,<sup>b,c</sup> Yurii Sushko,<sup>a,2</sup> Robert Körner,<sup>a,3</sup> Joachim Vogt<sup>a</sup> and Igor V. Tetko<sup>d,e,\*</sup>

<sup>a</sup>eADMET GmbH, Lichtenbergstraße 8, D-85748 Garching, Munich, Germany

<sup>b</sup>Rosettastein Consulting (UG), D-85354 Freising, Germany

<sup>c</sup>Wissenschaftszentrum Weihenstephan für Ernährung, Landnutzung und Umwelt, TUM-Technische Universität München, Freising, Germany

<sup>d</sup>Helmholtz Zentrum München - Research Center for Environmental Health (HMGU), Ingolstädter Landstraße 1 b. 60w, D-85764 Neuherberg, Germany

<sup>e</sup>BigChem GmbH, Ingolstädter Landstraße 1 b. 60w, D-85764 Neuherberg, Germany

<sup>1</sup> All research performed at eADMET GmbH.

<sup>1</sup>Currently employed by Facebook U.K. Ltd., London, UK

<sup>2</sup>Currently at Google Inc., Munich, Germany

<sup>3</sup>Currently at OSB AG, Regensburg, Germany

\* Address for correspondence

Dr. Igor V. Tetko,

Institute of Structural Biology,

Helmholtz Zentrum München - German Research Center for Environmental Health

(GmbH), Ingolstädter Landstraße 1,

D-85764 Neuherberg, Germany

itetko@vcclab.org

Tel.: +49-89-3187-3575

Fax: +49-89-3187-3585

#### Table of Contents:

|                                                                                                                                         |    |
|-----------------------------------------------------------------------------------------------------------------------------------------|----|
| 1) EPA ToxCast LELPredictor Marathon Match Results Summary<br>(Reprinted with Permission from the U.S. Environmental Protection Agency) | 1  |
| 2) Description of the consensus model for prediction of Lowest Effect Level                                                             | 19 |

---

|                                                    |    |
|----------------------------------------------------|----|
| (LEL) concentrations (Technical description) ..... | 25 |
| 3) Table S1 .....                                  |    |
| 4) References .....                                | 27 |

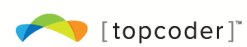

## *EPA ToxCast LELPredictor Marathon Match Results Summary*

## 1.0 Introduction

This document aims at providing a thorough analysis of the top placed (winner) submissions that were received as a part of the recently completed EPA ToxCast Marathon Match challenge. The document starts by outlining the testing and scoring set ups that were used in the challenge. This exercise is to provide a complete background of the results and outcomes that are discussed further. In the next section, a concise summary of the provisional and system scores of the winner submissions along with the same scores for algorithm provided by EPA are described. The document then discusses various methods and approaches that were implemented by the winners to solve the challenge and glosses over the features selection methods and feature combinations that were used. Further, it provides a detailed statistical analysis done by our internal team on the results from the challenge and draws insights on various important aspects of the outcome. Next, it shows comparisons between various dimensions ranging from differences in modeling approach between submissions to scoring. Finally, it draws conclusions from the results discussed earlier and provides a concise view on the outcome of the challenge.

### **Please note:**

1. The provided submission details and results are based on only top-4 submissions (based on final score) which are the prize winners in this contest.
2. All the analysis done here is based purely on the outcome of the Marathon Match. No insights presented here have been drawn from the follow-up round which is under-way currently. A separate analysis will be provided at the end of that round.
3. There have been few issues related to 1<sup>st</sup> place submission, specifically concerning the use of external data in the model which was not allowed in the match. But at this point we have not reached any conclusion and we are still in discussions with the winner to better understand the model and see if it actually uses any external data. It may be disqualified in such a scenario but at present, we are considering it as qualified submission and below analysis provides full details about that submission.
4. All the details provided in Section 4 related to the methods implemented by each submission has been extracted and summarized using the full documentation provided by the winners as a part of this match.

## 2.0 Testing and Scoring Mechanism

The data in this match consisted of 1854 chemicals. Internally, this data had been split into 3 groups:

- Group A contains 483 chemicals,
- Group B contains 143 chemicals, and
- Group C contains remaining 1228 chemicals.

.This problem had 1 example, 1 provisional and 1 system test case. The score for each test case was evaluated using [RMSE](#) metric. However, this metric was applied only to a certain subset of data:

- For example test case this subset is training data (the data for which we had shared LEL values with members). It contains all chemicals from group A.
- For provisional test case this subset contains 63 chemicals randomly selected from group B.
- For system test case this subset contains remaining 80 chemicals from group B.

For  $n$  chemicals, if  $x_i$  is the ground truth LEL and  $y_i$  is the predicted LEL value for a chemical  $i$ , then the score will be calculated as:

$$\text{Score} = 1,000,000.0 * (2 - \text{SquareRoot}(((x_0 - y_0)^2 + (x_1 - y_1)^2 + \dots + (x_{n-1} - y_{n-1})^2) / n))$$

**Note:** if any of  $y_i$  values is outside  $[-50, 50]$  range (and thus is obviously a very bad prediction), it was changed to -50 (if it is negative) or 50 (if it is positive) before the score was calculated.

### 3.0 Provisional and System Scores Summary (Top-4)

Table 3-1 provides system scores, final provisional scores and best provisional scores for top-4 submissions. It also provides system and provisional scores for algorithms provided by EPA. The number in the parenthesis signifies the rank obtained by submissions corresponding to the test case. For EPA provided submissions, it means the rank they would have achieved in current setup.

| Submission | System Score    | Final Prov. Score | Best Prov. Score |
|------------|-----------------|-------------------|------------------|
| noveserj   | 880,600.27 (#1) | 973,447.55 (#8)   | 973,447.55       |
| NobuMiu    | 869,008.54 (#2) | 972,777.97 (#9)   | 972777.97        |
| a9108tc    | 865,655.93 (#3) | 948,126.87 (#16)  | 1080134.36       |
| klo86min   | 860,859.77 (#4) | 906,363.11 (#27)  | 1054988.54       |

|           |                 |                 |           |
|-----------|-----------------|-----------------|-----------|
| EPA_Assay | 750421.99 (#14) | 747443.85 (#36) | 747443.85 |
| EPA_BP    | 795412.15 (#11) | 861629.73 (#31) | 861629.73 |

Table 3-1. System Score, Final Provisional Score and Best Provisional Score

## 4.0 Algorithms, Tools and Feature Selection Methods (Top-4)

The first success of this match is that we have been able to receive different machine learning/scientific approaches and variety of feature combinations use which was one of the major expectations. Analyzing the approaches of top-4 submissions, we observed a striking dichotomy in their roadmaps for solving this challenge. While the 1<sup>st</sup> place submission has used much more domain specific approach with the use of sophisticated models available in field of cheminformatics, the next two submissions in rank have used a more traditional machine learning (numerical-driven) approach. The 4<sup>th</sup> place submission used a mixture of both approaches. And it was an extremely interesting outcome to see that both these approaches competed very closely without much difference in their final performance in the provided set-ups. Such an outcome helps to instate the confidence that data science approach to such problems does perform as strong as any domain specific approach.

Below, we will provide a concise summary of each submission - algorithms and feature selection approaches - and refer to more details wherever required. The full version of all the materials that have been discussed below will be available to you along with code modules. Also, please ask for any references that have been used in the description and that will also be provided if not available online.

### Rank-1 Submission

As mentioned earlier, this submission was based more on domain-specific approach in which molecular descriptors were used as the only set of features and all these features were calculated on-the-fly from the SMILES code provided by EPA. SMILES codes and LEL values were the only data (from EPA provided data set) that this submission used for obtaining challenge predictions.

The model used by this submission was built using OCHEM. OCHEM (online chemical database and modeling environment, <https://ochem.eu>) is a publicly available web-based platform for QSAR research, developed and maintained by Helmholtz Zentrum Muenchen (<http://www.helmholtz-muenchen.de>) and eADMET GmbH (<http://eadmet.com>).

Ten individual LEL models were built using different in-silico descriptor packages available in OCHEM. **No EPA in-vitro features were used in this model.** Although several models with EPA

in-vitro features were built, their inclusion into the final model did not result into a statistically significant increase in prediction accuracy. The final model was built as a simple average consensus over these ten individual models.

Figure 4-1 illustrates the full architecture of the resulting LEL model.

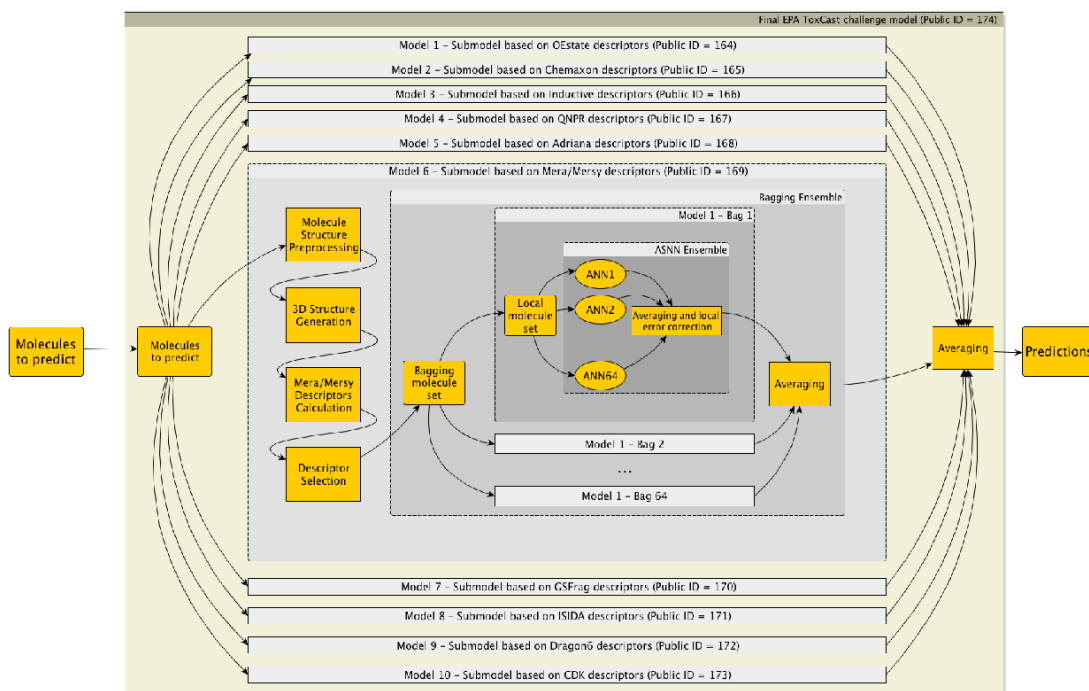

Figure 4-1. Final Consensus Model Diagram

Following is the brief outline of the process that this submission followed in achieving the predictions (excerpt created from full submission by the winner):

- All the molecular structures were preprocessed following a standardized OCHEM protocol in which the molecules were cleaned, neutralized, standardized and desalted.
- Some of the descriptors require a 3D representation of the molecule. These descriptors were calculated based on an optimized 3D structure representation using Corina tool by Molecular Networks GmbH.
- Ten different descriptor packages implemented in the public platform OCHEM were used individually to create ten models for the resulting consensus – here is the list of packages:

- Electrotopological state indices (E-State indices)
  - Chemaxon descriptors
  - Inductive descriptors
  - QNPR Descriptors
  - ADRIANA.Code
  - Mera, Mersy
  - GSfrag
  - ISIDA SMF descriptors
  - Dragon6 descriptors
  - CDK descriptors
- Within each individual model, basic unsupervised descriptor selection procedure was performed. First, descriptors with constant values for the dataset were removed. Next, descriptors with pair-wise correlation of more than 0.95 were eliminated.
- Bootstrap aggregation (bagging) meta-learning approach with the bag size of 64 was used in each individual model. That is, each of the ten individual models in the challenge are an ensemble of 64 models, built on different training sets, which were obtained from the original one through resampling with replacement.
- For all ten of the individual models, the Associative Neural Networks (ASSN) machine learning method was used. ASSN is the author's implementation of the algorithm that uses local error correction in neural network ensemble prediction space.
- The Final EPA ToxCast challenge model was applied to the full set of 1854 molecules. In the resulting predictions file there are 37 errors (descriptors for these molecules could not be calculated for various reasons). Predictions for these molecules were taken as a mean value for the training set = 3.2602  $-\log(M)$ .
- The final model is freely available from the OCHEM web site and can be accessed and used by the EPA without any limitations.

### **Rank-II Submission**

This submission use a more numerical-driven approach and completely base its solution on Random Forest algorithm. It does not use any other libraries or helper tools and strictly uses the data provided by EPA. Following is the outline of this solution:



- It uses Random Forest Algorithm of R package.
- Number of trees is 16000.
- Features from only following four files are used:
  - ToxRefDB\_Challenge\_Training.csv
  - TOX21S\_v4a\_8599\_11Dec2013.csv
  - toxprint\_v2\_vs\_TOX21S\_v4a\_8599\_03Dec2013.csv
  - ToxCast\_Summary\_AC50\_2013\_12\_10\_NO\_BSK.csv
- All the data in these files **except** the following is used as features: "CASRN", "chemical\_name", "ShortName", "TS\_ChemName", "TS\_ChemName\_Synonyms", "ChemNote", "STRUCTURE\_Formula", "STRUCTURE\_IUPAC", "STRUCTURE\_SMILES", "STRUCTURE\_SMILES\_Desalt".
- All NA data is replaced to -987654321 because it is a bit tricky to handle NA on random forest of R.
- And then features from STRUCTURE\_Formula and STRUCTURE\_MW are added.
- The complete source code that was used to locally compute the prediction is available.

### **Rank-III Submission**

This submission also use Random forest algorithm as the base but with different selections of features from Rank-II submission. This submission also uses ChemminR – a cheminformatics package available in R – to calculate some of the features.

Following is the outline of the submission:

- Random Forest is used for solving this problem, which generate a bunch of random decision trees according to the training data, and then merge the result from those trees into the overall prediction.
- Maximum depth of tree = 30 and minimum number of instances for each node = 5.
- Split selection for features and merging of predicts is done using statistical formulas which are available in the full version.
- Following guideline to select features was used: select the features that is mostly available for all data instances, and is rather clean with less noise.
- The following features were used in this solution.

- o MW
- o IntendedTarget
- o UseCategory
- o ChemType
- o ToxPrint
- o ToxCastSum
- o MW Desalted (generated by ChemmineR)
- o Chemical Property (generate by ChemineR)
- o Group Information (generated by ChemmineR)
- o Ring Information (generated by ChemmineR)

- All the code used in this solution is available for use.

#### **Rank-IV Submission**

*\*several scores are shown in this description. These scores were obtained on training set by the member locally. These scores should not be compared in any manner with the provisional or system scores obtained from final submission. All the details provided here are extracted from final documentation provided by winner – klo86min,*

This submission combines the earlier approaches, specifically from feature selection point of view and provides a hybrid flavor of the solution. The solution uses Random Forest approach at the base but also uses a couple of chemical descriptors libraries to calculate on-the-fly features for chemicals. Although, this solution has achieved a 4<sup>th</sup> place score, it has a very rich experiment base as it provides insights into different feature combinations and shows empirical evaluation of various approaches.

Following is the outline of the submission:

- A Random Forest solution has been chosen for its ability to handle “large p (features) small n (samples)” cases such as this one and also different variable importance it could compute.
- Table 4-1 shows short list of final features (30 highest importance – full set is available in Table A-1 of appendix), sorted by decreasing “removal” importance.

| Label                       | Removal Importance | Provider | Comment                                                                |
|-----------------------------|--------------------|----------|------------------------------------------------------------------------|
| High toxicity target        | 15281              | EPA      | ACHE/ESR1/ACACA/Ionchannel                                             |
| BSK_Sag_CD38_down           | 13676              | EPA      | Level 8 Hitcall                                                        |
| Low Toxicity target         | 8729               | EPA      | ALS/PPARA/PYGM                                                         |
| Missing target              | 7125               | EPA      |                                                                        |
| nNO                         | 5191               | Rdkit    |                                                                        |
| Morgan Fingerprint Acid     | 4918               | Rdkit    | Morgan Fingerprint, SMARTS: [\$(C,S)(=[O,S,P])-[O;H1,-1]]              |
| Halogen                     | 4681               | Rdkit    |                                                                        |
| Aromatic N                  | 4585               | Rdkit    |                                                                        |
| Morgan Fingerprint Aromatic | 4078               | Rdkit    | Morgan Fingerprint, SMARTS: [a]                                        |
| GRAV-6                      | 3887               | CDK      | PaDel-Descriptors                                                      |
| nC=O                        | 3607               | Rdkit    |                                                                        |
| nNH                         | 3432               | Rdkit    |                                                                        |
| BCUTp-1h                    | 3364               | CDK      | CDK Desc GUI                                                           |
| BCUTw-1h                    | 3281               | CDK      | CDK Desc GUI                                                           |
| Insecticide                 | 3193               | EPA      |                                                                        |
| Mild toxicity target        | 3170               | EPA      | Mitochondria/Sterolsynthesis/Microtuble/IonchannelNa/PPO/CHRNA/cyp19a1 |
| ATSc1                       | 3147               | CDK      | CDK Desc GUI                                                           |
| BCUTc-1h                    | 3086               | CDK      | CDK Desc GUI                                                           |
| ATSc2                       | 3058               | CDK      | CDK Desc GUI                                                           |
| BCUTp-1l                    | 3017               | CDK      | CDK Desc GUI                                                           |
| ALogP                       | 2987               | CDK      | CDK Desc GUI                                                           |
| GRAV-4                      | 2737               | CDK      | PaDel-Descriptors                                                      |
| ATSp5                       | 2656               | CDK      | CDK Desc GUI                                                           |
| MOMI-YZ                     | 2613               | CDK      | PaDel-Descriptors                                                      |
| NVS_ADME_hCYP2C19           | 2425               | EPA      | Level 8 Hitcall                                                        |
| ATSm5                       | 2405               | CDK      | CDK Desc GUI                                                           |
| MOMI-XY                     | 2398               | CDK      | PaDel-Descriptors                                                      |
| BCUTc-1l                    | 2297               | CDK      | CDK Desc GUI                                                           |
| Morgan Fingerprint Basic    | 2247               | Rdkit    | Morgan Fingerprint, SMARTS: [#7,+,\$([N;H2&+0])\$([C,a]);...           |
| Unknown target              | 2238               | EPA      |                                                                        |

Table 4-1. Short list of 30 most important final features

- “Removal Importance” is the difference of 2 scores, computed with and without the feature of interest.
- CDK and RDKit descriptor features have been used in addition to features obtained from EPA data. Some descriptors have also been build based on MACCS keys. All the input and output of the process of this feature extraction is available for use. All features are also available in various csv files.
- Following method was used for extracting EPA features:
  - o For numerical or binary categorical variable, original data was used.
  - o For missing values, it is set to zero. This is arbitrary and unfortunate but it scores better than using the mean.
  - o This flaw is partly compensated by the fact that in the final set of feature, there are not so many missing values and the RF method could still propagate those value and find a good split on the next depth.
  - o The only non-binary categorical variable that were parsed are the column of the file “ToxCast\_Generic\_Chemicals\_2013\_12\_10.csv”, namely “IntentedTarget” and “UseCategory”.
  - o “UseCategory” was grouped into more general classes: “Herbicide”, “Pesticide”,

- o “Flavor/Flagrance”, “Insecticide”, “Pharma/Drugs”.
- o “IntentedTarget” was grouped into different toxicity classes: “High”, “Mild”, “Low”, “Unknown”, and “Missing”.
- o Each class have been linked to targets according to what have been observed on training data (with a potential over-fit).
- o Figure 4-2 shows the breakdown of this classification with their relative importance:

| Label                | Removal Importance | Comment                                                                            |
|----------------------|--------------------|------------------------------------------------------------------------------------|
| Herbicide            | -855               |                                                                                    |
| Pesticide            | -1211              |                                                                                    |
| Flavor/Flagrance     | 958                |                                                                                    |
| Insecticide          | 3193               |                                                                                    |
| Pharmaceutical       | 1982               |                                                                                    |
| High toxicity target | 15281              | ACHE / ESR1 / ACACA / Ionchannel                                                   |
| Mild toxicity target | 3170               | Mitochondria / Sterolsynthesis / Microtuble / IonchannelNa / PPO / CHRNA / cyp19a1 |
| Low Toxicity target  | 8729               | ALS / PPARA / PYGM                                                                 |
| Unknown target       | 2238               | Labeled target with a label that do not fall in the 3 previous categories          |
| Missing target       | 7125               | Unlabeled target                                                                   |

Table 4-2. Breakdown of Classification sorted by removal importance

- An ensemble of randomly drawn decision trees (a Random Forest variation) is built using the scikit-learn libraries (Machine Learning in Python).
- The splitting criteria of the random forest regression is based on variance reduction, which is consistent with the root-mean-square error (RMSE) used for this contest.
- The best results were obtained with maximal randomness: random subset of sample drawn with replacement (bootstrap, bagging), random subset of feature is drawn for each split, randomly capped interval for the pool of tested “best split” values of selected features. The scikit function used is “ExtraTreesRegressor”.
- To illustrate the performances of the ExtraTreesRegressor, the member benchmarked few others models on the final set of features and Table 4-3 shows the results:

| Scikit-learn model    | Score     | Comment                                                 |
|-----------------------|-----------|---------------------------------------------------------|
| ExtraTreesRegressor   | 1,194,467 | Random forest with extra randomness on feature's domain |
| RandomForestRegressor | 1,166,786 | Classical Random forest                                 |
| KNeighborsRegressor   | 1,124,801 | K-Nearest Neighbors regressor                           |
| Ridge                 | 1,095,464 | Ridge regression                                        |

Table 4-3. Performance of different models on final set of features

- For error management, the member used both out-of-bag error (oob) of the RF, and average error over 3 random 8-folds cross validation sets. The oob errors has many advantages - it is a direct output of the RF training, it is unbiased as the cross-validation sets helps manage errors: poor convergence/high variance of results could be detected, as cross-validation score and oob score shall be equivalent. 24 cross-validation testing sets were used - they provide diverse configurations and allows to see if score changes/improvement were spread over all different testing sets or concentrated on only few ones.
- There is a long discussion provided in this submission about the process of selection of features and various experiments that were performed by the member. It will be available for use whenever required. Table A-2 (Appendix) summarizes the training performance of various feature combinations that were used by the member.
- The solution is to be considered as work-in-progress and some of suggested measures for improvement include adding more descriptors, SMARTS pattern, more level8 hitcalls and recursive feature augmentation process.

## 5.0 Statistical Analysis

- Once the match results were available, we used several statistical methods to analyze the outcome of the results and to quantify the substance in the provided solutions and achieved scores. In this section, we describe various metrics that we calculated based on the system score for all the available solutions and also for top-4 placed submission. This analysis is expected to give you a quick idea on the outcome of the match.
- As an initial step, a quick investigation was completed by building a graph of Final-Y vs Provisional-X scores. Figure 5-1 shows that graph which essentially shows the presence of predictive power in the dataset. Each point in the graph corresponds to one competitor. The X-Axis shows the provisional score of this competitor and the Y-Axis shows his/her final score.

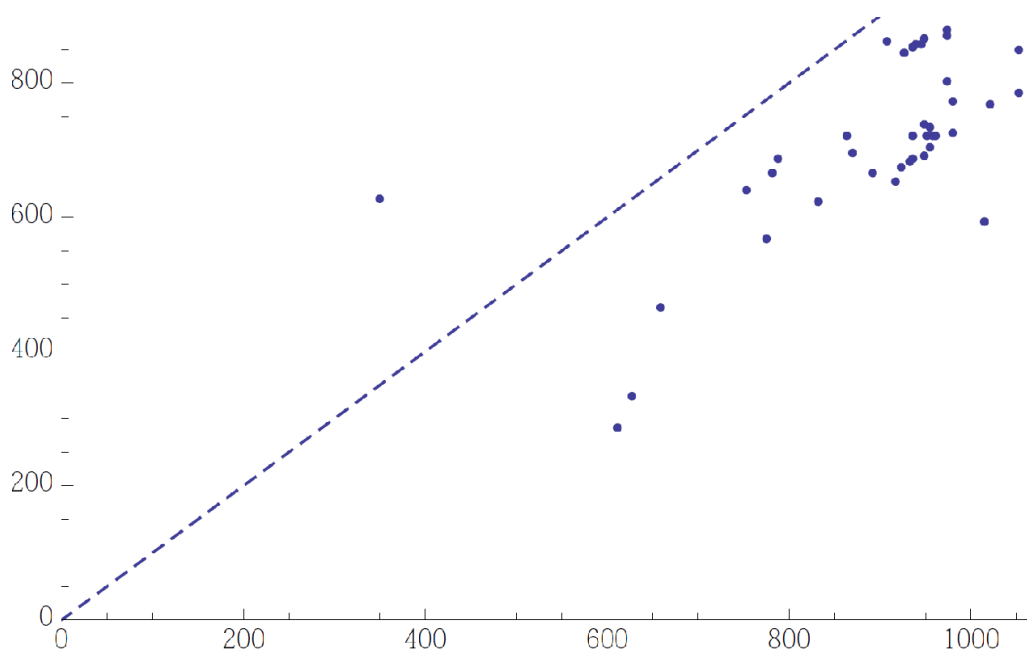

Figure 5-1. Final (Y-Axis) vs. Provisional (X-Axis) Scores

Q

- Following points are to be noted from the above graph:

- o The placement is non-random, so algorithms definitely see some predictive power in the data, what is already a great outcome for such a challenge.
- o In competition where provisional and system datasets are similar enough, submissions that are not overfitted to provisional dataset are expected to have similar provisional and final scores. Therefore points would concentrate around the diagonal (dotted line in the figure above). However, we clearly see that majority of the dots fall below the diagonal. This suggests significant overfitting effects and/or statistical bias between provisional and scoring datasets.
- o We think that in fact both overfitting and statistical bias took place. The provisional and system datasets were obtained by randomly splitting one single dataset which suggests that there should be no statistical bias. However, this is true only for sufficiently large datasets and in our case we had two pretty small datasets (with 63 and 80 points, respectively). Additional study shows that both datasets have almost the same LEL mean (around 2.791), but final dataset happens to have much larger LEL variance (1.314 against 1.083 in provisional).

- o Large LEL variance in final dataset means that higher RMSE values (and thus lower scores) should be expected. This explains why almost all dots on the figure above fall below the diagonal. Furthermore, LEL variance gives the maximum possible score for a solution that returns a constant value (and thus sees no predictive value in datasets). RMSE of 1.314 corresponds to a score of 686K. Therefore, all dots above Y = 686K (line Q) correspond to submissions that were able to find some predictive power in the data. (Solutions below line Q could also find some predictive power, but had some problems using their findings, or fighting overfitting, etc.)
  - o We can see that points lie on different distance from the diagonal. This shows that despite statistical bias between provisional and final datasets, there were definitely overfitting effects in the contest as well. However, it's important to note that almost all (more exactly, all except one) top (largest Y) points lie pretty close to the diagonal. This means that among the highest scoring group, all competitors did a very good job fighting overfitting. (One outlier dot among the top ones corresponds to 8-th place competitor.)
- As a next step, we calculated various metrics for a thorough analysis to gain more insights about the solutions and to understand the significance of the results. The metrics that were used for this analysis include:
- o RMSE: Root-Mean Squared Error (lower the value, better the result)
  - o RMSE (80%): RMSE on 80% best predictions (lowest prediction error)
  - o Pearson: just Pearson correlation coefficient (higher the value, better the result)
  - o Pearson (80%): the same on 80% best predictions
  - o AUC: percentage of pairs where predicted1 < predicted2 among those where ground\_truth1 < ground\_truth2 (higher the value, better the result)
  - o P-value: defines significance of the prediction, evaluated on 1 million random permutations.

Table 5-1 shows the above metrics for the top 4 solutions and also provides a comparison with the two solutions provided by EPA.

| Solution  | RMSE  | RMSE (80% best) | Pearson | Pearson (80% best) | AUC   | P-value   |
|-----------|-------|-----------------|---------|--------------------|-------|-----------|
| noveserj  | 1.119 | 0.657           | 0.561   | 0.661              | 0.701 | 0         |
| NobuMiu   | 1.13  | 0.649           | 0.551   | 0.672              | 0.683 | 0         |
| a9108tc   | 1.134 | 0.642           | 0.542   | 0.621              | 0.677 | 4.00E-006 |
| klo86min  | 1.139 | 0.667           | 0.538   | 0.673              | 0.682 | 0         |
| EPA_Assay | 1.249 | 0.733           | 0.336   | 0.518              | 0.616 | 1.51E-003 |
| EPA_BP    | 1.204 | 0.748           | 0.436   | 0.5                | 0.636 | 1.21E-004 |

Table 5-1. Various Metric Results on outcome of match

Comments based on the above results:

- The colored values in the table shows the statistically top performers in that particular metric. Those columns for which first 4 are not green signifies that some other submissions performed statistically better than the top-4 winners for that particular metric. But overall, top-4 have performed significantly better.

- As it is seen, the values of AUC and Pearson correlation coefficient are not very high overall showing that prediction in general is not an easy task.

- With a random AUC baseline of 50%, there is a significant difference between winner's 70% and EPA's solutions results of 62-64%.

- Generally, if one has 50% AUC it means that all the guesses are absolutely random. If one assumes that her subset consists of  $x$  fraction of chemicals that you predict 100% accurately, and  $1-x$  fraction of chemicals you predict absolutely randomly, then your expected AUC value is:

$$\text{AUC}\% = 100\% * [x^2 + 1/2 * (1-x^2)] = 50\% (1+x^2)$$

$$x = \text{SQRT} ((\text{AUC} - 50\%) / 50\%)$$

Based on the above formula:

| Solution    | AUC (%) | x   |
|-------------|---------|-----|
| EPA_Assay   | 61.6    | 48% |
| EPA_BP      | 63.6    | 52% |
| #1 Solution | 70.1    | 63% |

- Considering the above statistic, 63% over the other two solutions is a pretty good result.

- This is one and simple way to look at AUC. There are various ways to look at AUC and an extreme case model with a double Gaussian assumption would work as follows:

- o Assume that the LELs are distributed as Gauss with mean square deviation 1.
- o Assume that the LELs, predicted by algorithm, have equal precision, meaning they are distributed around true values with deviation  $x$ .
- o Derive AUC as a function of  $x$ . It is easy, as all the integrals can be taken analytically.
- o Turn it around as  $x$  vs AUC, so  $1/x$  would get you the level of granulation of the LEL distribution by algorithm (simply speaking, in how many categories the algorithm's precision allows to split the chemicals)

- The answer is simple (all integrals can be taken analytically):  $N=1/x = -\text{ctg}(\text{Pi} * \text{AUC} / 100\%)$ . Using this, the above three cases now turns out to be:



| Solution    | AUC (%) | N    |
|-------------|---------|------|
| EPA_Assay   | 61.6    | 0.38 |
| EPA_BP      | 63.6    | 0.46 |
| #1 Solution | 70.1    | 0.73 |

-  $N < 1$  means that the ability of solution to intentionally localize the value LEL of chemical is near but still within the natural deviation of LEL. But as one can see, comparatively the winner solution adds much more than just the random guess to the predictions (as N is comparable to 1).

## 6.0 Conclusions

The size of the data set, the natural variability within each set, and the subject domain of the problem combined to present a very ambitious challenge for a machine learning solution. The variety of techniques observed in solutions submitted to this [topcoder] contest, and the statistically significant performance of the solutions, lead us to conclude that the match successfully produced solutions that were in fact predictive. That these solutions also out-performed the algorithms supplied by the EPA, reinforced our confidence in both the applicability of data science techniques to this problem, and the immediate results of the solutions.

Following are the key highlights of what makes these results a positive outcome:

- The provided ToxCast data have been successfully used to predict statistically relevant LEL values, which verified the predictive power of the data, and reinforced confidence that data science can provide promising solutions to these problems.
- Two very different approaches to the same problem were discovered which provides a promising outlook on future directions in this undertaking. Specifically, a great comparative analysis is now available to gauge:
  - o Numerical driven data science approach (Random forest) vs. highly sophisticated domain-specific approach (OCHEM tool)
  - o Use of in-vitro features vs. use of molecular descriptors and also their combination.
  - o EPA's current algorithmic approach to the problem vs. solution available from community.
- Statistical analyses have shown that prediction was indeed tough with the given data set and overfitting issues but the winner solutions have combated such issues and shown significantly successful results. It has also shown that the overall outcome of the contest is strong with results that can prove to be baseline for further research.

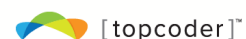

- Having said that, we would also like to add a word of caution that these results must be considered as the first step towards building a comprehensive and sophisticated machine learning approach for predicting LEL values.
- We are also doing some more statistical analysis and gauging the scientific relevance of these submissions through our follow-up round which will be presented separately. Such an analysis will help to build further confidence in this already promising outcome.

## **Appendix – Feature Sets used by Rank-IV submission**

| Index | Label                       | Removal Importance | Provider | Comment                                                                 |
|-------|-----------------------------|--------------------|----------|-------------------------------------------------------------------------|
| 5     | High toxicity target        | 15281              | EPA      | ACHE/ESR1/ACACA/tonchannel                                              |
| 63    | BSK_Seq_CD38_down           | 13676              | EPA      | Level 8 Hitcall                                                         |
| 7     | Low Toxicity target         | 8729               | EPA      | ALS/PPARA/PYGM                                                          |
| 9     | Missing target              | 7125               | EPA      |                                                                         |
| 54    | nNO                         | 5191               | Rdkit    |                                                                         |
| 62    | Morgan Fingerprint Acid     | 4918               | Rdkit    | Morgan Fingerprint, SMARTS: [\$(C,S)(=O,S,P)]-[O;H,-1]]                 |
| 59    | Halogen                     | 4681               | Rdkit    |                                                                         |
| 56    | Aromatic N                  | 4585               | Rdkit    |                                                                         |
| 60    | Morgan Fingerprint Aromatic | 4078               | Rdkit    | Morgan Fingerprint, SMARTS: [a]                                         |
| 40    | GRAV-6                      | 3887               | CDK      | PaDel-Descriptors                                                       |
| 52    | nC=O                        | 3607               | Rdkit    |                                                                         |
| 53    | nNH                         | 3432               | Rdkit    |                                                                         |
| 19    | BCUTp-1h                    | 3364               | CDK      | CDK Desc GUI                                                            |
| 15    | BCUTw-1h                    | 3281               | CDK      | CDK Desc GUI                                                            |
| 3     | Insecticide                 | 3193               | EPA      |                                                                         |
| 6     | Mild toxicity target        | 3170               | EPA      | Mitochondria/Sterolsynthesis/Microtubule/tonchannelNa/PPO/CHRNA/cyp19a1 |
| 20    | ATSc1                       | 3147               | CDK      | CDK Desc GUI                                                            |
| 17    | BCUTc-1h                    | 3086               | CDK      | CDK Desc GUI                                                            |
| 21    | ATSc2                       | 3058               | CDK      | CDK Desc GUI                                                            |
| 18    | BCUTp-1l                    | 3017               | CDK      | CDK Desc GUI                                                            |
| 11    | ALogP                       | 2967               | CDK      | CDK Desc GUI                                                            |
| 39    | GRAV-4                      | 2737               | CDK      | PaDel-Descriptors                                                       |
| 31    | ATSp5                       | 2656               | CDK      | CDK Desc GUI                                                            |
| 44    | MOMI-YZ                     | 2613               | CDK      | PaDel-Descriptors                                                       |
| 64    | NvS_ADME_hCYP2C19           | 2425               | EPA      | Level 8 Hitcall                                                         |
| 29    | ATSm5                       | 2405               | CDK      | CDK Desc GUI                                                            |
| 43    | MOMI-X-Y                    | 2398               | CDK      | PaDel-Descriptors                                                       |
| 16    | BCUTc-1l                    | 2297               | CDK      | CDK Desc GUI                                                            |
| 61    | Morgan Fingerprint Basic    | 2247               | Rdkit    | Morgan Fingerprint, SMARTS: [#;+,\$(N;H2&+0)]\$(C,a);...                |
| 8     | Unknown target              | 2238               | EPA      |                                                                         |
| 33    | TopoPSA                     | 2195               | CDK      | CDK Desc GUI                                                            |
| 57    | H acceptors                 | 2133               | Rdkit    |                                                                         |
| 30    | ATSp4                       | 2002               | CDK      | CDK Desc GUI                                                            |
| 4     | Pharmaceutical              | 1982               | EPA      |                                                                         |
| 58    | H donors                    | 1732               | Rdkit    |                                                                         |
| 37    | GRAVH-1                     | 1717               | CDK      | PaDel-Descriptors                                                       |
| 51    | nOH                         | 1660               | Rdkit    |                                                                         |
| 28    | ATSm4                       | 1551               | CDK      | CDK Desc GUI                                                            |
| 14    | BCUTw-1l                    | 1469               | CDK      | CDK Desc GUI                                                            |
| 32    | MLogP                       | 1274               | CDK      | CDK Desc GUI                                                            |
| 10    | Molar weight                | 1207               | EPA      |                                                                         |
| 42    | MOMI-Z                      | 1173               | CDK      | PaDel-Descriptors                                                       |
| 13    | AMR                         | 1103               | CDK      | CDK Desc GUI                                                            |
| 36    | XLogP                       | 1081               | CDK      | CDK Desc GUI                                                            |
| 45    | MOMI-R                      | 1019               | CDK      | PaDel-Descriptors                                                       |
| 2     | Flavor/Flagrance            | 958                | EPA      |                                                                         |
| 24    | ATSc5                       | 834                | CDK      | CDK Desc GUI                                                            |
| 22    | ATSc3                       | 820                | CDK      | CDK Desc GUI                                                            |
| 50    | Estatemin                   | 801                | Rdkit    |                                                                         |
| 35    | VABC                        | 789                | CDK      | CDK Desc GUI                                                            |
| 25    | ATSm1                       | 764                | CDK      | CDK Desc GUI                                                            |
| 12    | ALogp2                      | 747                | CDK      | CDK Desc GUI                                                            |
| 27    | ATSm3                       | 736                | CDK      | CDK Desc GUI                                                            |
| 48    | geomShape                   | 173                | CDK      | PaDel-Descriptors                                                       |
| 41    | MOMI-Y                      | 13                 | CDK      | PaDel-Descriptors                                                       |
| 38    | GRAVH-3                     | -1                 | CDK      | PaDel-Descriptors                                                       |
| 26    | ATSm2                       | -180               | CDK      | CDK Desc GUI                                                            |
| 34    | VAdjMat                     | -217               | CDK      | CDK Desc GUI                                                            |
| 49    | Estatemax                   | -280               | Rdkit    |                                                                         |
| 55    | Phenol                      | -487               | Rdkit    |                                                                         |
| 0     | Herbicide                   | -855               | EPA      |                                                                         |
| 47    | geomDiameter                | -922               | CDK      | PaDel-Descriptors                                                       |
| 23    | ATSc4                       | -1178              | CDK      | CDK Desc GUI                                                            |
| 1     | Pesticide                   | -1211              | EPA      |                                                                         |
| 46    | geomRadius                  | -1327              | CDK      | PaDel-Descriptors                                                       |

Table A-1. Full feature set used by Rank-IV submission

| Descriptors                                                                             | Score     |
|-----------------------------------------------------------------------------------------|-----------|
| CDK + Rdkit                                                                             | 1,104,812 |
| 72 Level8 hitcalls (shortlist after recursive selection)                                | 1,080,170 |
| EPA features: Categories, MW, 72 level8 hitcalls                                        | 1,148,333 |
| EPA with 72 level8 hitcalls +<br>CDK + Rdkit                                            | 1,187,827 |
| MACCS Keys                                                                              | 1,080,908 |
| CDK + Rdkit + Morgan Fingerprints                                                       | 1,121,801 |
| EPA without any level8 hitcalls +<br>CDK + Rdkit + Morgan Fingerprint features          | 1,180,151 |
| EPA with 72 level8 hitcalls +<br>CDK + Rdkit + Morgan Fingerprint features              | 1,191,101 |
| EPA with only 2 level 8 hitcalls +<br>CDK + Rdkit + Morgan Fingerprint features (Final) | 1,194,467 |

Table A-2. Scores for various feature combinations

## Description of the consensus model for prediction of Lowest Effect Level (LEL) concentrations (Technical description)

### Brief summary

The model used in the EPA ToxCast challenge was built using OCHEM (helper tool described in the *EPA ToxCast - Chemical Structural Descriptors (pdf version)*, pdf document under section “Databases” - “Online Chemical database”, page 51).

OCHEM (online chemical database and modeling environment, <http://ochem.eu>)<sup>1</sup> is a publicly available web-based platform for QSAR research, developed and maintained by Helmholtz Zentrum München (<http://www.helmholtz-muenchen.de>) and BIGCHEM GmbH (<http://bigchem.de>).

Within the scope of the challenge, the 483 molecules with experimental LEL values were uploaded to OCHEM. They were used as the training set for the model (<http://ochem.eu/basket/101620>). Additionally, the whole challenge set of 1854 molecules without values were uploaded to OCHEM and used for predictions (<http://ochem.eu/basket/102518>). According to the EPA ToxCast challenge rules, no additional data from OCHEM-Database were used in this challenge, except for the data provided in the challenge.

The profile of the model used in the challenge is publicly available from the following link (<http://ochem.eu/model/174>), the article profile with links to the model and data are available from the following link (<http://ochem.eu/article/68104>).

### Data preparation

The dataset from the *ToxRefDB\_Challenge\_Training.csv* file was used as a reference for creating training and test sets for the challenge. The file contains 1854 rows, each row representing one molecule. For 483 rows the experimental LEL values were provided, the rest were considered as predicted (test) set.

The file *ToxRefDB\_Challenge\_Training.csv* was appended by the SMILES column. The SMILES information was taken from the files containing structural information - *ToxCast\_Generic\_Chemicals/csv/ToxCast\_Generic\_Chemicals\_2013\_12\_10.csv*. Pairwise correspondence between the rows of the files was established using the CASRN column, which was present in both mentioned files.

The resulting file was uploaded to the OCHEM using the batch data upload tool (<http://docs.ochem.eu/display/MAN/Batch+data+upload>). Besides the LEL values and SMILES structural information, molecule names and CASRN were uploaded for convenience purposes.

### OCHEM Modeling Workflows

Within the scope of the challenge, default OCHEM workflows were used for individual model creation process, as well as for the process of applying model to the final test set. Figure S1 illustrates the simplified OCHEM workflows for the modeling process.

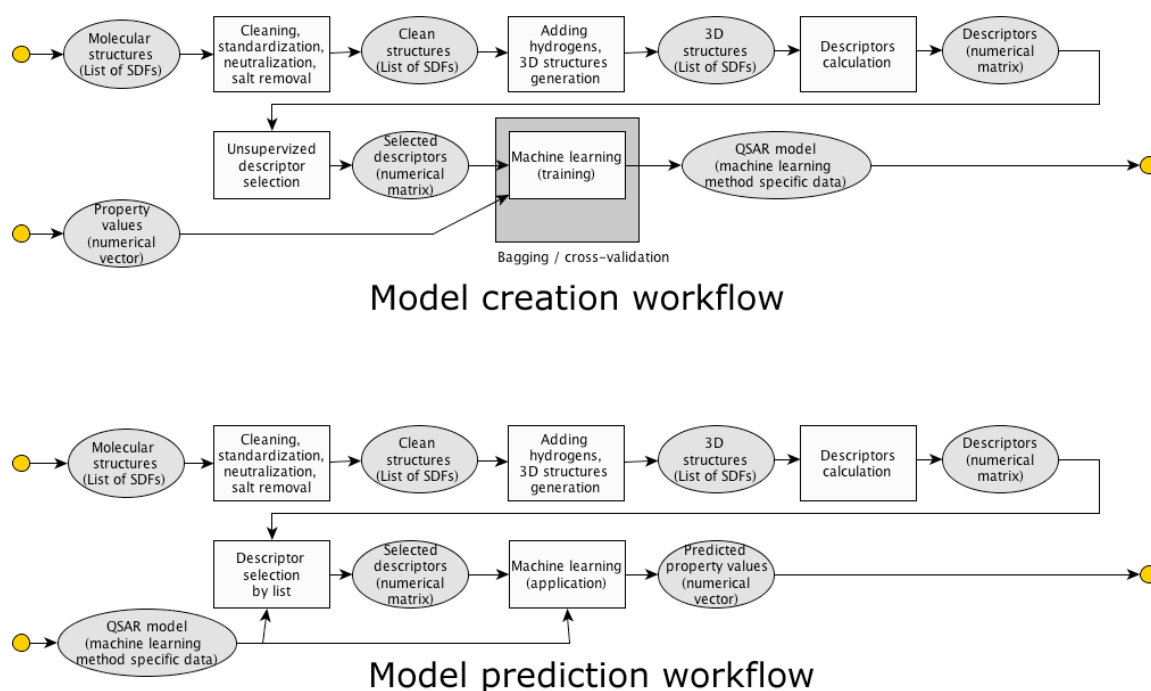

**Figure S1.** Simplified model creation and prediction workflows used in the challenge.

The model training involves the following steps (described in greater detail in the next section):

- preprocessing of the initial molecular structures, cleaning, neutralization and salts removal
- generation of 3D coordinated (for the workflows that use 3D descriptors)
- calculation of the full descriptor matrix
- unsupervised descriptor selection based on descriptor correlation
- training of the model using the machine learning model, this step often includes meta-learning techniques like bootstrap aggregation
- output of the resulting model (machine learning method - specific data)

Application of this model shares a significant amount of steps with the training process and involves:

- preprocessing of the initial molecular structures, cleaning, neutralization and salts removal
- generation of 3D coordinated (for the workflows that use 3D descriptors)
- calculation of the full descriptor matrix
- descriptor selection based on the list of required descriptors for the model being applied
- application of the machine learning model using the model data and descriptor matrix
- output of resulting predictions

### Model description

Within the scope of the challenge, ten individual LEL models were built according to the previously mentioned workflows using different in-silico descriptor packages available in OCHEM. No EPA in-vitro features were used in this model. Although within the scope of the challenges several models with EPA in-vitro features were built, their inclusion into the final model did not result into a statistically significant increase in prediction accuracy.

The final model was built as a simple average consensus over these ten individual models. Figure S2 illustrates the full architecture of the resulting LEL model.

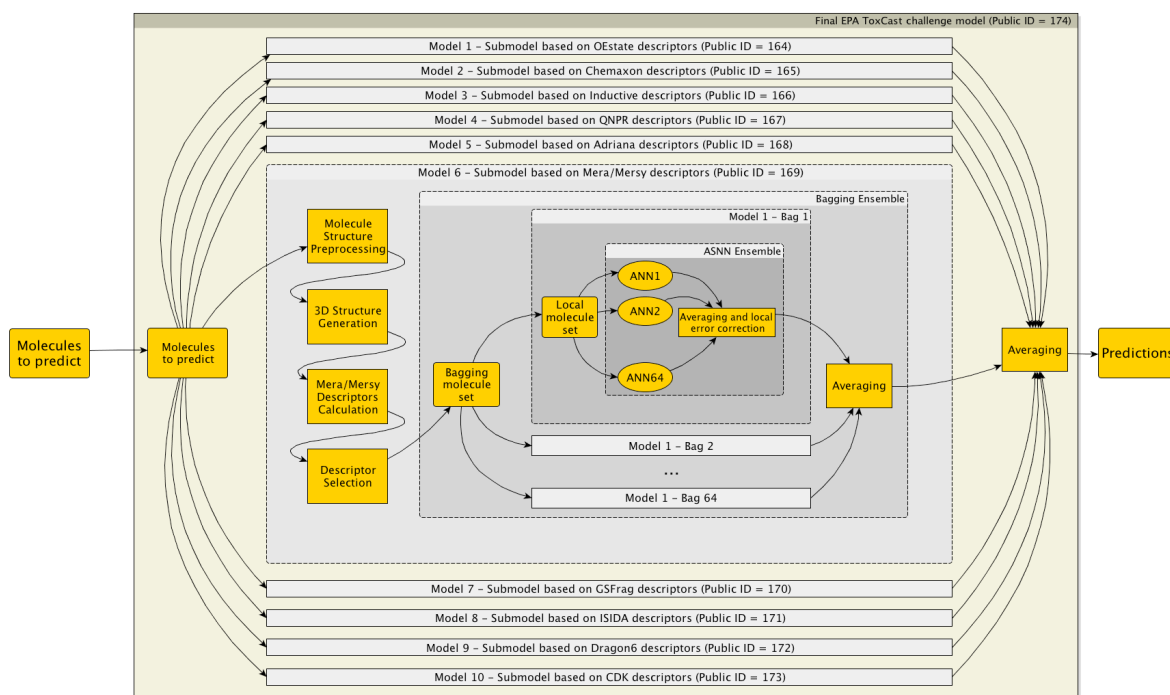

**Figure S2.** Final consensus model structure diagram

The rationale to use the consensus model is based on the earlier observations,<sup>2-5</sup> that such models usually provides higher accuracy compared to the individual approaches. Indeed, the models developed using different descriptors have different biases and their combination decreases their variances thus providing the optimal performance.<sup>6, 7</sup>

**Data preprocessing.** All the molecular structures were preprocessed following a standardized OCHEM protocol. The molecules were:

- *Cleaned* - the molecule structure was exported to SMILES format and imported back, the 2D coordinates were then recalculated from scratch.
- *Neutralized* - charged atoms in the molecules were neutralized by attaching additional hydrogen atoms to them.
- *Standardized* - inconsistent representation of Nitro groups was unified.
- *Remove salts* - all salts or counter-ions were removed, only the largest molecular fragment was kept.

More information on OCHEM data preprocessing protocol is available at the OCHEM manual page - <http://docs.ochem.eu/display/MAN/Molecule+preprocessing>

**3D Structure generation.** Some of the descriptors require a 3D representation of the molecule. These descriptors were calculated based on an optimized 3D structure representation. The optimization was performed using OCHEM recommended optimization protocol that utilizes Corina<sup>8</sup> tool by Molecular Networks GmbH.

**Descriptor packages.** Ten different descriptor packages implemented in the public

platform OCHEM were used individually to create ten models for the resulting consensus.

- *Electrotopological state indices (E-State indices)* - molecular descriptors introduced by Kier and Hall.<sup>9,10</sup> The descriptors combine electronic and topological properties of the described molecules. More information can also be found on the OCHEM manual page for E-State indices - <http://docs.ochem.eu/display/MAN/ESTATE>
- *Chemaxon descriptors* - also known as Chemaxon calculator plugins, is a set of in-silico prediction tools provided by Chemaxon. More information can be found on the manual page (<http://docs.ochem.eu/display/MAN/Chemaxon+descriptors>) or on Chemaxon calculator plugin page (<http://www.chemaxon.com/products/calculator-plugins/>).
- *Inductive descriptors*<sup>11</sup> - the descriptors calculated based on models of inductive and steric effects, inductive electronegativity and molecular capacitance. These molecular parameters are accessible from electronegativities and covalent radii of the constituent atoms and interatomic distances and can reflect a variety of aspects of intra- and intermolecular interactions (<http://docs.ochem.eu/display/MAN/Inductive+Descriptors>).
- *QNPR Descriptors* - quantitative name-property relationship descriptors are derived directly from the compounds name or SMILES strings. For each molecule either canonical SMILES or IUPAC name are split into fragments of a specified length, and the fragments become the descriptor names. The values are calculated as the number of occurrences of a particular fragment in a string for a molecule. In the challenge the OCHEM implementation of QNPR was used, calculated over SMILES of length 1 - 3, only descriptors that occur in more than 5 molecules in the set were kept (<http://docs.ochem.eu/display/MAN/QNPR>).
- *ADRIANA.Code* - is a descriptor package provided by Molecular Networks GmbH. It contains a series of methods for the generation of 3D structures and the calculation of physicochemical descriptors and molecular properties based on rapid empirical models (<http://docs.ochem.eu/display/MAN/Adriana.CODE>).
- *Mera, Mersy*<sup>12</sup> - descriptor package developed by Prof. V.A. Potemkin, ModelChem group (<http://docs.ochem.eu/display/MAN/MERA+descriptors>).
- *GSfrag*<sup>13, 14</sup> - a descriptor package that allows to calculate the occurrence numbers of certain special fragments on  $k=2, \dots, 10$  vertices in a molecular graph (<http://docs.ochem.eu/display/MAN/GSFrag>).
- *ISIDA SMF descriptors*<sup>15</sup> - the ISIDA implementation of the substructural molecular fragments (SMF) method, which is based on the splitting of a molecule into fragments. The fragment type is then a descriptor, and the number of occurrences of this fragment in a molecule is the value for this descriptor (<http://docs.ochem.eu/display/MAN/ISIDA+Fragments>).

Fragment lengths 2 - 4 were used in the challenge.

- *Dragon6 descriptors*<sup>16</sup> - a descriptor set from a popular descriptor tool - Dragon - developed by Kode s.r.l. (<http://docs.ochem.eu/display/MAN/Dragon>).
- *CDK descriptors* - a set of descriptors implemented in the open-source Chemistry Development Kit. The constitutional, topological, geometrical, electronic and hybrid descriptor classes were used in the challenge



(<http://docs.ochem.eu/display/MAN/CDK>).

**Descriptor selection.** Within each individual model, basic unsupervised descriptor selection procedure was performed. First, descriptors with constant values for the dataset were removed. Next, descriptors with pair-wise correlation of more than 0.95 were eliminated.

**Bootstrap aggregation (bagging) meta-learning** approach with the bag size of 64 was used in each individual model. That is, each of the ten individual models in the challenge are an ensemble of 64 models, built on different training sets, which were obtained from the original one through resampling with replacement (<http://docs.ochem.eu/display/MAN/Bagging>).

**Machine learning method.** For all ten of the individual models, the Associative Neural Networks<sup>17, 18</sup> (ASNN) machine learning method was used. ASNN is the author's implementation of the algorithm that uses local error correction in neural network ensemble prediction space.

The approach has a deep neurophysiological background and was inspired by the work of Dr. Tetko on the analysis of neuronal coding.<sup>19,20</sup> It exploits an idea of ensemble learning. The ASNN approach has been used to introduce concepts of local libraries and self-learning, property-based similarity, applicability domain of models.<sup>4,18,21</sup> The models developed with the ASNN were top-ranked in several benchmarking studies<sup>2,4,5,22</sup> and that is why this method was selected for the EPA challenge.

In the challenge, neural network ensembles of size 64 were used, with the individual neural networks having 3 neurons in a hidden layer, trained by the SuperSAB algorithm. These are default parameters, which were optimized in the previous studies. Additional info can be also found on the OCHEM manual page - <http://docs.ochem.eu/display/MAN/ASNN+-+Associative+Neural+Networks>.

It should be noticed that all sub-models were built using default settings as specified on Comprehensive Modeling template web page, as illustrated on Figure S3. (<http://ochem.eu/multiplemodels/create.do>). No optimization of parameters was used for the challenge.

Training set (required): LEL\_training [details]  
Add a validation set

The model will predict this property:  
LEL using unit:  $-\log(M)$

Select the methods you want to use for the modeling:

| Method                                                                                                                                                                                                                                                                                                                                                                                  | Descriptors                                                                                                                                                                                                                                                                                                                                                                                                                                                                                                                                                                                                                                                                                                                                                                                                                                                                    | Descriptor selection                                                                                                                                                                                        | Model validation                                                                                                                                                                                                                                                                                                                      |
|-----------------------------------------------------------------------------------------------------------------------------------------------------------------------------------------------------------------------------------------------------------------------------------------------------------------------------------------------------------------------------------------|--------------------------------------------------------------------------------------------------------------------------------------------------------------------------------------------------------------------------------------------------------------------------------------------------------------------------------------------------------------------------------------------------------------------------------------------------------------------------------------------------------------------------------------------------------------------------------------------------------------------------------------------------------------------------------------------------------------------------------------------------------------------------------------------------------------------------------------------------------------------------------|-------------------------------------------------------------------------------------------------------------------------------------------------------------------------------------------------------------|---------------------------------------------------------------------------------------------------------------------------------------------------------------------------------------------------------------------------------------------------------------------------------------------------------------------------------------|
| <input type="checkbox"/> ANN [edit] [x]<br><input checked="" type="checkbox"/> ASNN (bias correction) [edit] [x]<br><input type="checkbox"/> KNN [edit] [x]<br><input type="checkbox"/> LibSVM [edit] [x]<br><input type="checkbox"/> FSMLR [edit] [x]<br><input type="checkbox"/> MLRA [edit] [x]<br><input type="checkbox"/> PLS [edit] [x]<br><a href="#">+add a custom template</a> | <input type="checkbox"/> CDK [edit] [x]<br><input checked="" type="checkbox"/> Dragon v.6 (all blocks) [edit] [x]<br><input checked="" type="checkbox"/> OEstate [edit] [x]<br><input checked="" type="checkbox"/> ISIDA Fragments (Length 2 - 4) [edit] [x]<br><input checked="" type="checkbox"/> GSFrag [edit] [x]<br><input checked="" type="checkbox"/> Mera and Mersy [edit] [x]<br><input checked="" type="checkbox"/> Chemaxon descriptors [edit] [x]<br><input checked="" type="checkbox"/> Inductive Descriptors [edit] [x]<br><input checked="" type="checkbox"/> Adriana [edit] [x]<br><input type="checkbox"/> Spectrophores [edit] [x]<br><input checked="" type="checkbox"/> QNPR (SMILES - length 1 - 3 threshold 5) [edit] [x]<br><input type="checkbox"/> Two simple descriptors (MW+Number of carbons) [edit] [x]<br><a href="#">+add a custom template</a> | <input type="checkbox"/> Unsupervised forward selection [edit] [x]<br><input checked="" type="checkbox"/> Simple pairwise decorrelation ( $r < 0.95$ ) [edit] [x]<br><a href="#">+add a custom template</a> | <input type="checkbox"/> 5-fold cross-validation [edit] [x]<br><input type="checkbox"/> 5-fold cross-validation (stratified) [edit] [x]<br><input checked="" type="checkbox"/> Bagging with 64 models [edit] [x]<br><input type="checkbox"/> Bagging with 64 models (stratified) [edit] [x]<br><a href="#">+add a custom template</a> |

Show advanced options>>

Considering the selection above, 10 models will be created.

[Create the models](#)

**Figure S3.** Comprehensive modeling settings, which were used to develop the models.

## Obtaining challenge predictions

The Final EPA ToxCast challenge model (<http://ochem.eu/model/174>) was applied to the full set of 1854 molecules (<http://ochem.eu/basket/102518>). The calculation results can be obtained from the public task profile (<http://ochem.eu/pendingtasks/profile.do?id=587790>).

Predictions were exported in CSV format, the file *ModelPredictions\_1854\_compounds.csv* was obtained. The training set was also exported for convenience reasons, resulting in the file *LEL\_training.csv*.

In the resulting predictions file there are 37 errors (descriptors for these molecules could not be calculated for various reasons). Predictions for these molecules were taken as a mean value for the training set = 3.2602  $-\log(M)$ . Finally, 483 values for the training set molecules were substituted by their experimental results. The result was converted to the required format, *LELPredictor.java*.

All manipulations over the exported CSV files were performed using a simple Perl script (*reader.pl*).

The final model <http://ochem.eu/model/174> is freely available from the OCHEM web site and can be accessed and used by the EPA as well as any other web users without any limitations. The development and publishing models on-line allows their wide dissemination to chemical community, allows a rigorous validation of all steps of model development and it will be increasingly used in the future.<sup>23</sup>

**Table S1.** Statistical parameters of models developed using different descriptors, machine learning methods and validation protocols using On-line CHEMical database and Modeling environment (<http://ochem.eu>)

A) RMSE errors of cross-validation and bagging models.

Predicted property: LEL  
Training set: LEL\_training

Metrics: RMSE - Root Mean Square Error for Training set Validation: Cross-Validation (55 models)

|                                                                    | ASNN | KNN  | LibSVM | PLS  | PLS(2) |
|--------------------------------------------------------------------|------|------|--------|------|--------|
| CDK (constitutional, topological, geometrical, electronic, hybrid) | 0.98 | 0.95 | 0.95   | 0.96 | 0.95   |
| Dragon6 (blocks: 1-29)                                             | 0.98 | 0.96 | 0.92   | 0.97 | 0.94   |
| Fragmentor (Length 2 - 4)                                          | 1.07 | 1    | 0.96   | 0.97 | 0.97   |
| GSFrag                                                             | 1.07 | 1.02 | 1.06   | 1.03 | 1.02   |
| Mera, Mersy                                                        | 1.04 | 0.94 | 0.93   | 0.96 | 0.96   |
| ChemaxonDescriptors (7.4)                                          | 0.98 | 0.99 | 0.98   | 1    | 0.99   |
| InductiveDescriptors                                               | 0.99 | 0.99 | 1      | 1.15 | 1.04   |
| Adriana                                                            | 0.97 | 1    | 0.98   | 1.08 | 1.04   |
| QNPR (SMILES - length 1 - 3 threshold 5)                           | 1.01 | 1.01 | 0.94   | 0.97 | 0.97   |
| OEstate                                                            | 1    | 0.99 | 0.99   | 0.97 | 0.97   |
| EPA_LEL                                                            | 1.09 | 1.01 | 1      | 8    | 1.16   |

Predicted property: LEL  
Training set: LEL\_training

Metrics: RMSE - Root Mean Square Error for Training set Validation: Bagging (55 models)

|                                                                    | ASNN | KNN  | LibSVM | PLS  | PLS(2) |
|--------------------------------------------------------------------|------|------|--------|------|--------|
| CDK (constitutional, topological, geometrical, electronic, hybrid) | 0.93 | 0.93 | 0.9    | 0.94 | 0.93   |
| Dragon6 (blocks: 1-29)                                             | 0.93 | 0.95 | 0.9    | 0.96 | 0.94   |
| Fragmentor (Length 2 - 4)                                          | 0.98 | 0.97 | 0.91   | 0.99 | 0.96   |
| GSFrag                                                             | 0.97 | 0.98 | 0.94   | 0.98 | 0.97   |
| Mera, Mersy                                                        | 0.93 | 0.93 | 0.91   | 1.2  | 0.95   |
| ChemaxonDescriptors (7.4)                                          | 0.93 | 0.98 | 0.94   | 0.97 | 0.94   |
| InductiveDescriptors                                               | 0.94 | 0.98 | 0.94   | 0.99 | 0.99   |
| Adriana                                                            | 0.93 | 0.94 | 0.92   | 1.01 | 0.98   |
| QNPR (SMILES - length 1 - 3 threshold 5)                           | 0.95 | 0.99 | 0.92   | 0.93 | 0.93   |
| OEstate                                                            | 0.96 | 0.95 | 0.91   | 0.94 | 0.93   |
| EPA_LEL                                                            | 0.99 | 1    | 0.97   | 7    | 1.05   |

## B) Square of Pearson correlation coefficient of cross-validation and bagging models

Predicted property: LEL  
 Training set: LEL\_training

Metrics: R2 for Training set Validation: Bagging (55 models)

|                                                                    | ASNN | KNN  | LibSVM | PLS  | PLS(2) |
|--------------------------------------------------------------------|------|------|--------|------|--------|
| CDK (constitutional, topological, geometrical, electronic, hybrid) | 0.22 | 0.19 | 0.24   | 0.19 | 0.2    |
| Dragon6 (blocks: 1-29)                                             | 0.24 | 0.17 | 0.23   | 0.19 | 0.2    |
| Fragmentor (Length 2 - 4)                                          | 0.18 | 0.17 | 0.22   | 0.15 | 0.17   |
| GSFrag                                                             | 0.16 | 0.1  | 0.16   | 0.12 | 0.12   |
| Mera, Mersy                                                        | 0.21 | 0.19 | 0.23   | 0.08 | 0.18   |
| ChemaxonDescriptors (7.4)                                          | 0.22 | 0.1  | 0.2    | 0.14 | 0.17   |
| InductiveDescriptors                                               | 0.18 | 0.11 | 0.17   | 0.09 | 0.08   |
| Adriana                                                            | 0.22 | 0.17 | 0.2    | 0.08 | 0.11   |
| QNPR (SMILES - length 1 - 3 threshold 5)                           | 0.2  | 0.16 | 0.2    | 0.21 | 0.2    |
| OEstate                                                            | 0.18 | 0.18 | 0.22   | 0.19 | 0.21   |
| EPA_LEL                                                            | 0.1  | 0.09 | 0.11   | 0    | 0.03   |

The published models which, contribute to the final consensus model, are shown in blue.

Predicted property: LEL  
 Training set: LEL\_training

Metrics: R2 for Training set Validation: Cross-Validation (55 models)

|                                                                    | ASNN | KNN  | LibSVM | PLS  | PLS(2) |
|--------------------------------------------------------------------|------|------|--------|------|--------|
| CDK (constitutional, topological, geometrical, electronic, hybrid) | 0.2  | 0.16 | 0.16   | 0.13 | 0.17   |
| Dragon6 (blocks: 1-29)                                             | 0.22 | 0.16 | 0.2    | 0.15 | 0.18   |
| Fragmentor (Length 2 - 4)                                          | 0.13 | 0.14 | 0.15   | 0.13 | 0.13   |
| GSFrag                                                             | 0.08 | 0.06 | 0.07   | 0.04 | 0.041  |
| Mera, Mersy                                                        | 0.12 | 0.2  | 0.19   | 0.14 | 0.14   |
| ChemaxonDescriptors (7.4)                                          | 0.18 | 0.08 | 0.11   | 0.07 | 0.08   |
| InductiveDescriptors                                               | 0.14 | 0.09 | 0.06   | 0    | 0.021  |
| Adriana                                                            | 0.2  | 0.11 | 0.11   | 0    | 0.013  |
| QNPR (SMILES - length 1 - 3 threshold 5)                           | 0.18 | 0.11 | 0.18   | 0.14 | 0.14   |
| OEstate                                                            | 0.15 | 0.13 | 0.13   | 0.13 | 0.13   |
| EPA_LEL                                                            | 0.05 | 0.08 | 0.07   | 0    | 0      |

## References

- (1) Horvath, D., Lisurek, M., Rupp, B., Kuhne, R., Specker, E., von Kries, J., Rognan, D., Andersson, C. D., Almqvist, F., Elofsson, M., Enqvist, P. A., Gustavsson, A. L., Remez, N., Mestres, J., Marcou, G., Varnek, A., Hibert, M., Quintana, J., and Frank, R. (2014) Design of a general-purpose European compound screening library for EU-OPENSECREEN. *ChemMedChem* 9, 2309-2326.
- (2) Tetko, I. V., Sushko, I., Pandey, A. K., Zhu, H., Tropsha, A., Papa, E., Oberg, T., Todeschini, R., Fourches, D., and Varnek, A. (2008) Critical assessment of QSAR models of environmental toxicity against *Tetrahymena pyriformis*: focusing on applicability domain and overfitting by variable selection. *J. Chem. Inf. Model.* 48, 1733-1746.
- (3) Zhu, H., Tropsha, A., Fourches, D., Varnek, A., Papa, E., Gramatica, P., Oberg, T., Dao, P., Cherkasov, A., and Tetko, I. V. (2008) Combinatorial QSAR Modeling of Chemical Toxicants Tested against *Tetrahymena pyriformis*. *J. Chem. Inf. Model.* 48, 766-784.
- (4) Sushko, I., Novotarskyi, S., Korner, R., Pandey, A. K., Cherkasov, A., Li, J., Gramatica, P., Hansen, K., Schroeter, T., Muller, K. R., Xi, L., Liu, H., Yao, X., Oberg, T., Hormozdiari, F., Dao, P., Sahinalp, C., Todeschini, R., Polishchuk, P., Artemenko, A., Kuz'min, V., Martin, T. M., Young, D. M., Fourches, D., Muratov, E., Tropsha, A., Baskin, I., Horvath, D., Marcou, G., Muller, C., Varnek, A., Prokopenko, V. V., and Tetko, I. V. (2010) Applicability Domains for Classification Problems: Benchmarking of Distance to Models for Ames Mutagenicity Set. *J. Chem. Inf. Model.* 50, 2094-2111.
- (5) Tetko, I. V., Novotarskyi, S., Sushko, I., Ivanov, V., Petrenko, A. E., Dieden, R., Lebon, F., and Mathieu, B. (2013) Development of dimethyl sulfoxide solubility models using 163 000 molecules: using a domain applicability metric to select more reliable predictions. *J. Chem. Inf. Model.* 53, 1990-2000.
- (6) Geman, S., Bienenstock, E., and Doursat, R. (1992) Neural networks and the bias-variance dilemma. *Neural Comput.* 4, 1-58.
- (7) Tetko, I. V., Livingstone, D. J., and Luik, A. I. (1995) Neural network studies. 1. Comparison of overfitting and overtraining. *J. Chem. Inf. Comput. Sci.* 35, 826-833.
- (8) Online Demo - Fast 3D Structure Generation with CORINA.  
[http://www.molecular-networks.com/online\\_demos/corina\\_demo](http://www.molecular-networks.com/online_demos/corina_demo) (March 6, 2016).
- (9) Hall, L. H., and Kier, L. B. (1995) Electrotopological State Indexes for Atom Types - a Novel Combination of Electronic, Topological, and Valence State Information. *J. Chem. Inf. Comput. Sci.* 35, 1039-1045.
- (10) Kier, L. B., and Hall, L. H. (1999) *Molecular Structure Description: The Electrotopological State*. Academic Press, London.
- (11) Cherkasov, A. (2005) 'Inductive' Descriptors: 10 Successful Years in QSAR. *Curr. Comp. Aid. Drug Design* 1, 21-42.
- (12) Potemkin, V. A., and Grishina, M. A. (2008) A new paradigm for pattern recognition of drugs. *J. Comput. Aided. Mol. Des.* 22, 489-505.
- (13) Skvortsova, M. I., Baskin, I. I., Skvortsov, L. A., Palyulin, V. A., Zefirov, N. S., and Stankevich, I. V. (1999) Chemical graphs and their basis invariants. *J. Mol. Struct.* 466, 211-217.
- (14) Skvortsova, M. I., Fedyaev, K. S., Baskin, I. I., Palyulin, V. A., and Zefirov, N. S. (2002) A New Technique for Coding Chemical Structures Based on Basis

- Fragments. *Dokl. Chem.* 382, 33-36.
- (15) Varnek, A., Fourches, D., Horvath, D., Klimchuk, O., Gaudin, C., Vayer, P., Solov'ev, V., Hoonakker, F., Tetko, I. V., and Marcou, G. (2008) ISIDA - Platform for virtual screening based on fragment and pharmacophoric descriptors. *Curr. Comput.-Aided Drug Des.* 4, 191-198.
  - (16) Todeschini, R., and Consonni, V. (2000) *Handbook of Molecular Descriptors*. WILEY-VCH, Weinheim.
  - (17) Tetko, I. V. (2002) Neural network studies. 4. Introduction to associative neural networks. *J. Chem. Inf. Comput. Sci.* 42, 717-728.
  - (18) Tetko, I. V. (2008) Associative neural network. *Methods Mol. Biol.* 458, 185-202.
  - (19) Villa, A. E., Tetko, I. V., Hyland, B., and Najem, A. (1999) Spatiotemporal activity patterns of rat cortical neurons predict responses in a conditioned task. *Proc. Natl. Acad. Sci. U. S. A.* 96, 1106-1111.
  - (20) Tetko, I. V., and Villa, A. E. (2001) A pattern grouping algorithm for analysis of spatiotemporal patterns in neuronal spike trains. 2. Application to simultaneous single unit recordings. *J. Neurosci. Methods* 105, 15-24.
  - (21) Tetko, I. V., Poda, G. I., Ostermann, C., and Mannhold, R. (2009) Large-scale evaluation of log P predictors: local corrections may compensate insufficient accuracy and need of experimentally testing every other compound. *Chem. Biodivers.* 6, 1837-1844.
  - (22) Tetko, I. V., Solov'ev, V. P., Antonov, A. V., Yao, X., Doucet, J. P., Fan, B., Hoonakker, F., Fourches, D., Jost, P., Lachiche, N., and Varnek, A. (2006) Benchmarking of linear and nonlinear approaches for quantitative structure-property relationship studies of metal complexation with ionophores. *J. Chem. Inf. Model.* 46, 808-819.
  - (23) Tetko, I. V. (2012) The perspectives of computational chemistry modeling. *J. Comput. Aided. Mol. Des.* 26, 135-136.
